# Supplementary material
Source: publisher figshare collection journal article supplement (https://karger.figshare.com/ndownloader/files/28743300)
Supplement: Supplementary file 1 [file 28743300]

**Table S1. Baseline characteristics before (entire cohort) and after propensity score matching (matched cohort)**


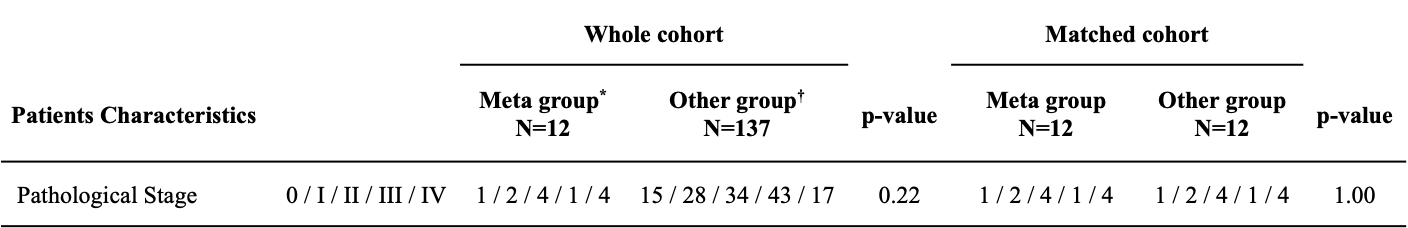


*Meta group: patients whose pulmonary nodules were metastatic

†Other group: patients whose pulmonary nodules were not metastatic
